# Supplementary material for: New insights into Li diffusion in Li–Si alloys for Si anode materials: role of Si microstructures
Source: Royal Society of Chemistry journal article supplement (doi:10.1039/c9nr03986d), 2019-01-01
Supplement: c9nr03986d1.pdf [file c9nr03986d1.pdf]

†Electronic Supplementary Information (ESI) for

## New insights into Li diffusion in Li-Si alloy for Si anode materials: role of Si microstructure

Guoqing Wang,<sup>ab</sup> Bo Xu,<sup>\*a</sup> Jing Shi,<sup>a</sup> Musheng Wu,<sup>a</sup> Haibin Su,<sup>\*c</sup> and Chuying Ouyang<sup>\*a</sup>

a. Department of Physics, Laboratory of Computational Materials Physics, Jiangxi Normal University, Nanchang 330022, China

b. Institute of Fundamental and Frontier Sciences, University of Electronic Science and Technology of China, Chengdu, 610054, China

c. Department of Chemistry, Hongkong University of Science and Technology, Hongkong, China

Email: [bxu4@mail.ustc.edu.cn](mailto:bxu4@mail.ustc.edu.cn), [haibinsu@ust.hk](mailto:haibinsu@ust.hk), [cuouyang@hotmail.com](mailto:cuouyang@hotmail.com)

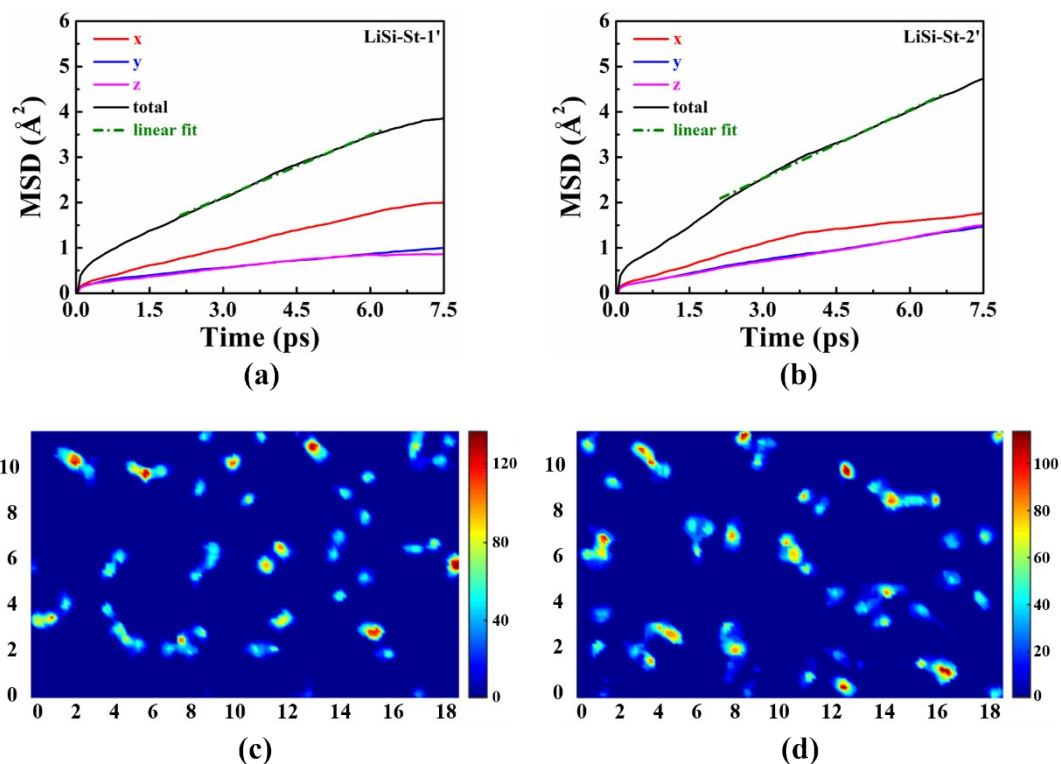

**Fig. S1** Total and projected MSD profiles along x, y and z directions for all Li ions in (a) LiSi-St-1' and (b) LiSi-St-2' at 800 K. The density map of the projected plane of the Si atoms along x direction in (c) LiSi-St-1' and (d) LiSi-St-2', the brighter the region is, the denser the distribution of Si atoms is.

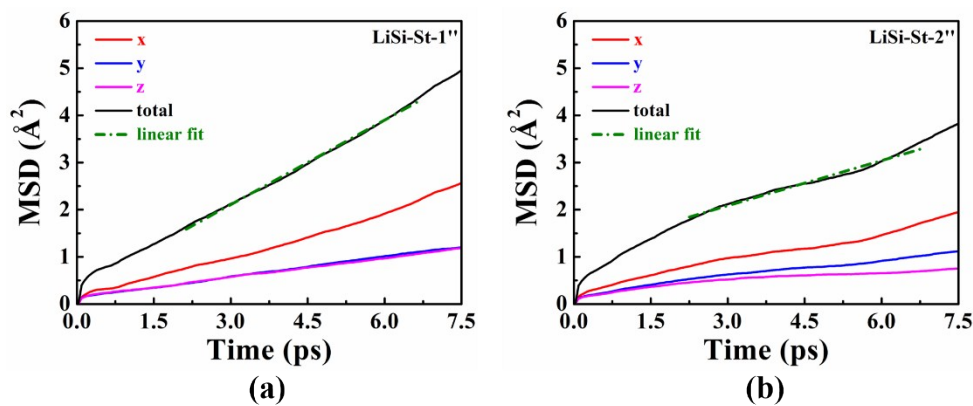

**Fig. S2** Total and projected MSD profiles along x, y and z directions for all Li ions in (a) LiSi-St-1'' and (b) LiSi-St-2'' at 800 K.

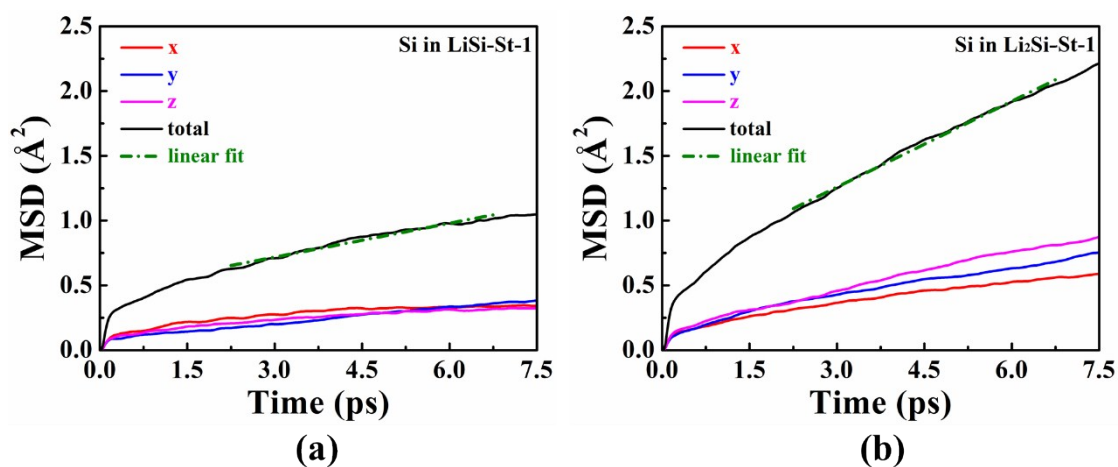

**Fig. S3** Total and projected MSD profiles along x, y and z directions for all Si atoms in (a) LiSi-St-1 and (b) Li<sub>2</sub>Si-St-1 at 800 K.

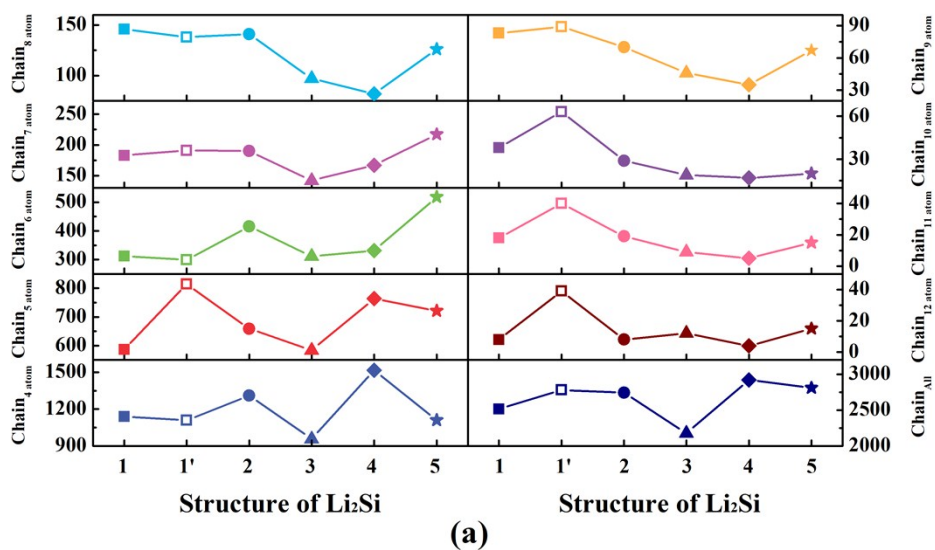

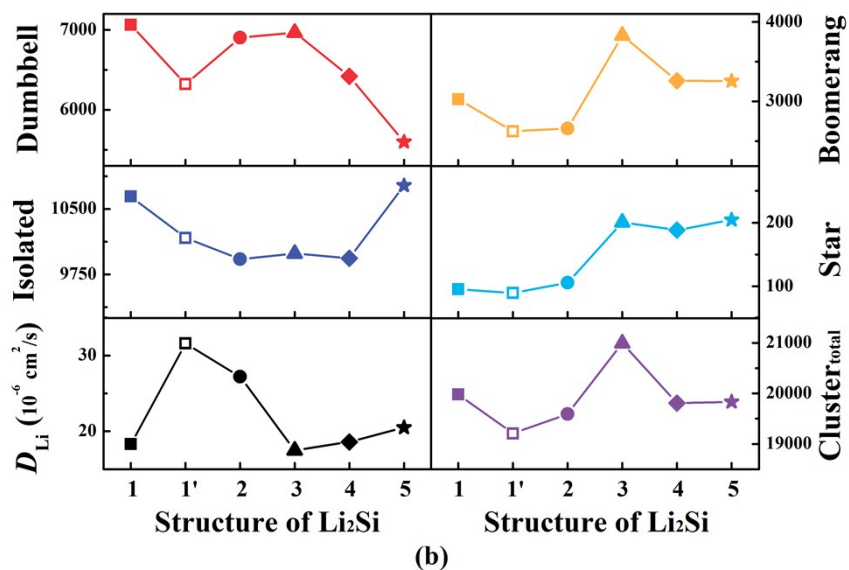

**Fig. S4** (a) Number of chains with different Si atomic number for various  $\text{Li}_2\text{Si}$  structures. (b) Number of small clusters with different Si atomic number, total number of clusters and diffusion coefficients for various  $\text{Li}_2\text{Si}$  structures.

Table S1 Diffusion coefficient ( $D_{\text{Li}}$ ) of Li ions (unit:  $10^{-6} \text{ cm}^2/\text{s}$ ) and channel area ratio for Li diffusion for various  $\text{LiSi}$  structures

|                 | St-1 | St-1' | St-1'' | St-2 | St-2' | St-2'' | St-3 | St-4 | St-5 |
|-----------------|------|-------|--------|------|-------|--------|------|------|------|
| $D_{\text{Li}}$ | 5.0  | 7.5   | 9.8    | 11.3 | 8.4   | 5.3    | 6.7  | 10.3 | 10.8 |
| $S_x$ (%)       | 67.2 | 71.1  | 70.2   | 73.4 | 69.9  | 67.6   | 68.1 | 71.4 | 73.3 |

Table S2 Number of rings with different Si atomic number for various  $\text{LiSi}$  structures

|        | rings3 | rings4 | rings5 | rings6 | rings7 | rings8 | r-total |
|--------|--------|--------|--------|--------|--------|--------|---------|
| St-1   | 373    | 624    | 450    | 268    | 162    | 344    | 2221    |
| St-1'  | 162    | 197    | 524    | 629    | 82     | 100    | 1694    |
| St-1'' | 322    | 218    | 636    | 383    | 171    | 132    | 1862    |
| St-2   | 265    | 212    | 691    | 323    | 111    | 144    | 1746    |
| St-2'  | 226    | 181    | 772    | 617    | 93     | 81     | 1970    |
| St-2'' | 381    | 285    | 683    | 513    | 176    | 93     | 2131    |
| St-3   | 404    | 336    | 564    | 364    | 147    | 51     | 1866    |
| St-4   | 183    | 452    | 431    | 276    | 80     | 38     | 1460    |
| St-5   | 282    | 374    | 237    | 486    | 85     | 93     | 1557    |

Table S3 Diffusion coefficient ( $D_{Li}$ ) of Li ions (unit:  $10^{-6}$  cm<sup>2</sup>/s) and number of small clusters for various Li<sub>2</sub>Si structures

|       | $D_{Li}$ | Isolated | Dumbbell | Boomerang | Star | total |
|-------|----------|----------|----------|-----------|------|-------|
| St-1  | 18.3     | 10642    | 7064     | 3025      | 97   | 19978 |
| St-1' | 31.6     | 10169    | 6323     | 2624      | 91   | 19207 |
| St-2  | 27.2     | 9926     | 6903     | 2657      | 108  | 19594 |
| St-3  | 17.5     | 9990     | 6968     | 3830      | 207  | 20995 |
| St-4  | 18.6     | 9934     | 6421     | 3259      | 194  | 19808 |
| St-5  | 20.5     | 10769    | 5598     | 3255      | 211  | 19833 |

Table S4 Number of chains with different Si atom number for various Li<sub>2</sub>Si structures

|       | ch-4 | ch-5 | ch-6 | ch-7 | ch-8 | ch-9 | ch-10 | ch-11 | ch-12 | total |
|-------|------|------|------|------|------|------|-------|-------|-------|-------|
| St-1  | 1140 | 587  | 312  | 183  | 146  | 83   | 38    | 18    | 8     | 2527  |
| St-1' | 1108 | 814  | 299  | 191  | 138  | 89   | 63    | 40    | 39    | 2781  |
| St-2  | 1310 | 659  | 416  | 190  | 141  | 70   | 29    | 19    | 8     | 2842  |
| St-3  | 956  | 584  | 311  | 142  | 97   | 46   | 19    | 9     | 12    | 2176  |
| St-4  | 1516 | 764  | 331  | 167  | 82   | 35   | 17    | 5     | 4     | 2921  |
| St-5  | 1109 | 721  | 518  | 217  | 126  | 67   | 20    | 15    | 15    | 2808  |
